# Supplementary material for: Fragmentation disrupts the seasonality of Amazonian evergreen forests
Source: Research Square preprint supplement (doi:10.21203/rs.3.rs-722038/v1), 2021-07-29
Supplement: Supplementary file 1 [file 3f2ad0d52c2d063634e43466.pdf]

# 1    **Fragmentation disrupts the seasonality of Central Amazonian evergreen forests**

2

## 3    **Authors**

4    Matheus H. Nunes <sup>1,11</sup>, José Luis C. Camargo <sup>2</sup>, Grégoire Vincent <sup>3</sup>, Kim Calders <sup>4</sup>, Rafael S. Oliveira  
5    <sup>5</sup>, Alfredo Huete <sup>6</sup>, Yhasmin Mendes de Moura <sup>7, 8</sup>, Bruce Nelson <sup>9</sup>, Marielle N. Smith <sup>10</sup>, Scott C.  
6    Stark <sup>10</sup>, Eduardo E. Maeda <sup>1</sup>

7

8    <sup>1</sup> Department of Geosciences and Geography, University of Helsinki, Helsinki, 00014, Finland

9    <sup>2</sup> Biological Dynamics of Forest Fragment Project, National Institute for Amazonian Research,  
10    Manaus, AM, 69067-375 Brazil

11    <sup>3</sup> AMAP, Univ Montpellier, IRD, CIRAD, CNRS, INRAE, Montpellier, France

12    <sup>4</sup> CAVelab – Computational and Applied Vegetation Ecology, Department of Environment, Faculty  
13    of Bioscience Engineering, Ghent University, Ghent, Belgium

14    <sup>5</sup> Department of Plant Biology, Institute of Biology, University of Campinas, Campinas, Brazil

15    <sup>6</sup> School of Life Sciences, Faculty of Science, University of Technology Sydney, Sydney, NSW  
16    2007, Australia

17    <sup>7</sup> Institute of Geography and Geoecology, Karlsruhe Institute of Technology (KIT), Kaiserstr. 12,  
18    76131, Karlsruhe, Germany

19    <sup>8</sup> Centre for Landscape and Climate Research, School of Geography, Geology and the Environment,  
20    University of Leicester, Leicester, LE17RH, United Kingdom

21    <sup>9</sup> National Institute of Amazonian Research, Manaus, Brazil

22    <sup>10</sup> Department of Forestry, Michigan State University, East Lansing, MI, USA

23    <sup>11</sup> Corresponding author ([matheus.nunes@helsinki.fi](mailto:matheus.nunes@helsinki.fi))

24

25 **Supplementary Information**

26

27 **Supplementary methods 1. Study site and TLS data collection**

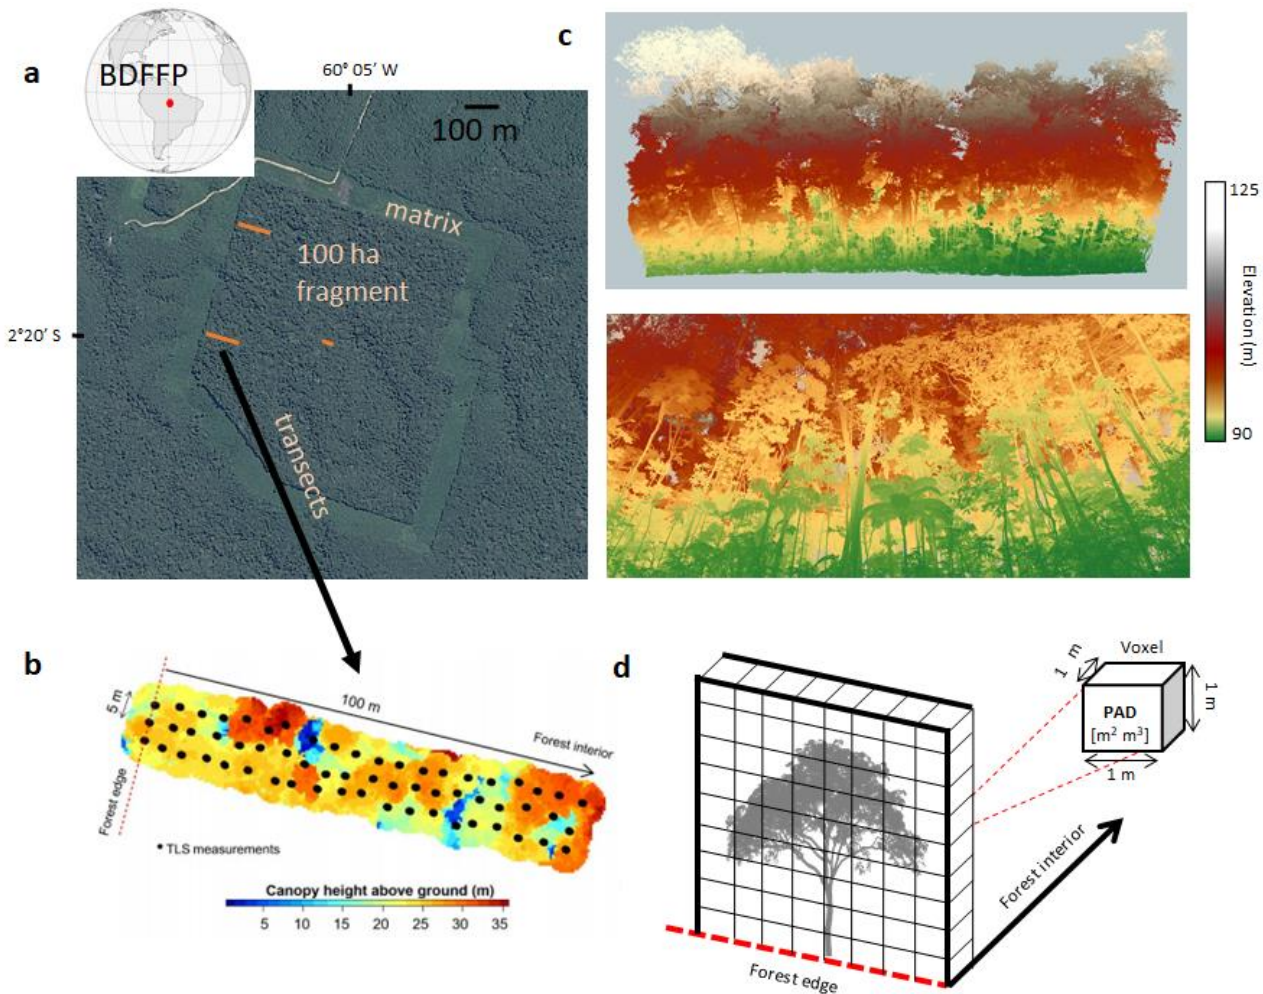

28

29 Supplementary Figure 1. a) The Biological Dynamics of Forest Fragments Project (BDFFP), the

30 world's longest-running experimental study of habitat fragmentation, is located in Central Amazonia.

31 The selected 100-ha forest fragment to serve as our experiment is surrounded by a 100 m matrix,

32 regularly cleaned by cutting the regrowth vegetation to keep the forest fragment isolated. Three

33 transects (two of 100 x 10 m at the edges and one of 30 x 10 m at the forest interior) were monitored

34 biweekly between April and October using a terrestrial LiDAR. b) Each transect consisted of three

35 scan lines parallel to each other with scans spaced by 5 m within and between lines. Given that the

36 RIEGL VZ-400i has a zenith angle range of 30–130°, an additional scan was acquired at each

37 sampling location with the scanner tilted at 90° from the vertical position. c) A total of 276 scans

across all transects resulted in a complete sampling of the full hemisphere in each scan location. All scans were later co-registered into a single point cloud per transect. The figures depict a section of a transect's point cloud from a lateral view and from below canopy. d) Plant area density (PAD,  $\text{m}^2 \text{m}^{-3}$ ) for all transects were then calculated using a voxel-based approach (with a 5 m buffer around each transect to maximise the PAD data). The volume occupied by vegetation within each transect was divided into  $1 \text{ m}^3$  voxels, and the PAD calculated for each of these voxels.

**Supplementary methods 2. PAI variation with distance from edges**

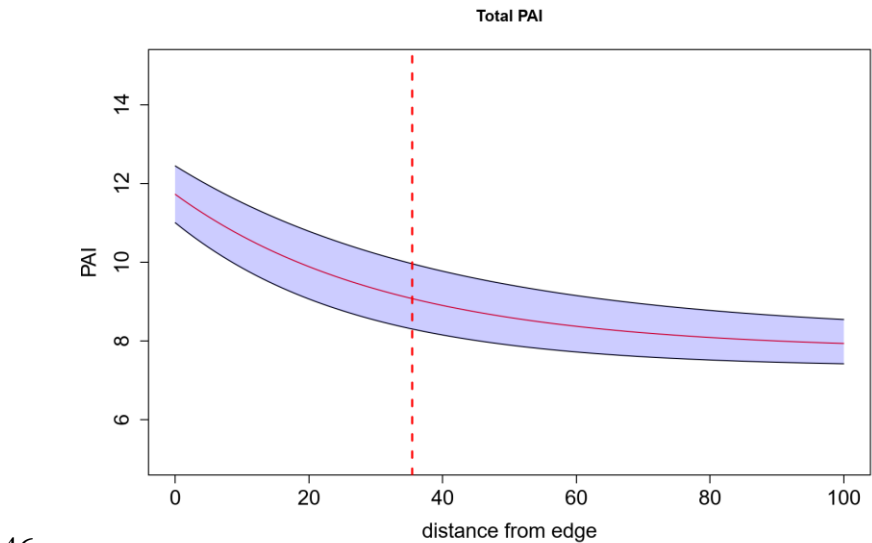

Supplementary Figure 2. Predicted effects of distance from edge (metres) on plant area index (PAI,  $\text{m}^2 \text{m}^{-2}$ ), obtained by fitting non-linear mixed models. The solid red curve is the prediction based on parameter values, and the shaded curve corresponding to the 95% confidence intervals. The dashed vertical red line depicts the optimal edge distance threshold fitted a hockey-stick model.

**Supplementary methods 3. Vertical PAI variation with distance from edges**

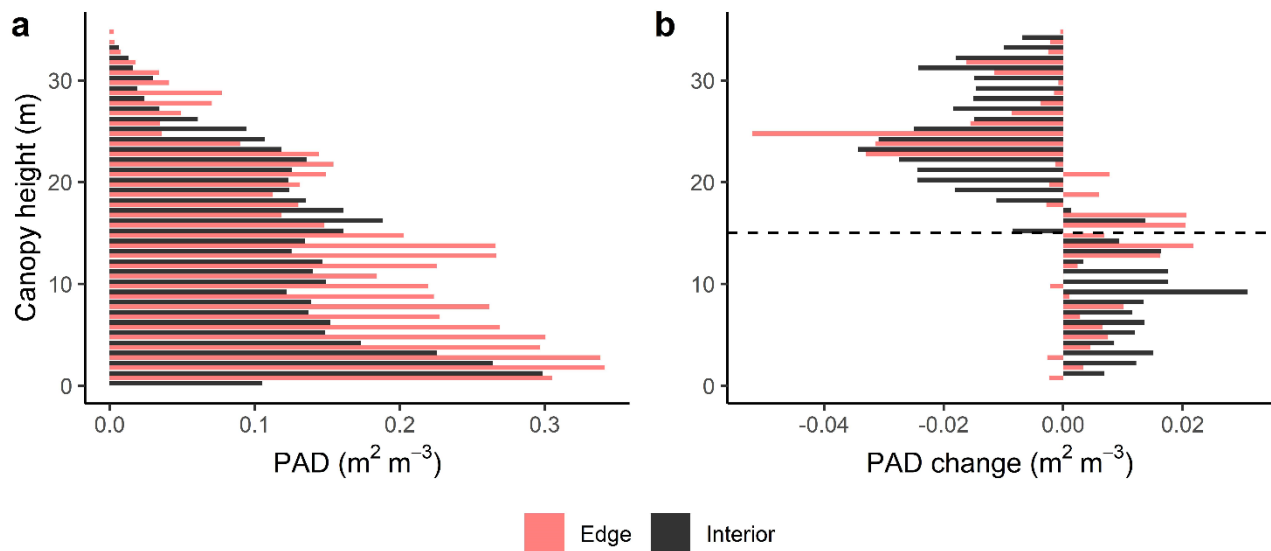

Supplementary Figure 3. a) Mean plant area density (PAD) of forest edges (red) and undisturbed forests in the interior of the fragment (black) per 1-m canopy height. b) PAD changes during the dry season ( $\text{PAD}_{16\text{th October}} - \text{PAD}_{24\text{th June}}$ ) per 1-m canopy height. The dashed horizontal line represents a canopy height threshold of 15 m indicating a shift in PAD change, which was used to separate upper canopy from understory.

#### Supplementary methods 4. Total PAI for edges and interior

Supplementary Table 1. Results from mixed-effects models ( $\text{PAI} \sim 1 + 1|\text{Transect}$ ) taking the non-independence of data from the same transect into account by including a random-effect term ‘transect’. We performed  $\chi^2$  tests to compare this LME model with other LME models that contained the variables *time*, *edge effects* and an interaction term *time* x *edge effects* to examine the significance of seasonality and fragmentation on PAI variation.  $\chi^2$ -tests and *P* values were performed by comparing to random-intercept models of the form  $\text{PAI} \sim 1 + (1|\text{Transect})$  and model explanatory power was assessed in terms of AIC. Models with the lowest AIC and significantly different  $\chi^2$  for each stratum was selected (in bold).

| Model      | Stratum    | $\chi^2$ | Pvalue | AIC    |
|------------|------------|----------|--------|--------|
| PAI ~ 1    | Understory |          |        | 291263 |
| PAI ~ time | Understory | 0        | 1      | 291241 |

|                                         |                     |               |                      |               |
|-----------------------------------------|---------------------|---------------|----------------------|---------------|
| PAI ~ <i>edge effects</i>               | Understory          | 3705.3        | <2e-16 ***           | 287559        |
| <b>PAI ~ time x <i>edge effects</i></b> | <b>Understory</b>   | <b>3713.3</b> | <b>&lt;2e-16 ***</b> | <b>287549</b> |
| PAI ~ 1                                 | Upper canopy        |               |                      | 202153        |
| PAI ~ time                              | Upper canopy        | 0             | 1                    | 202245        |
| PAI ~ <i>edge effects</i>               | Upper canopy        | 116.44        | <2e-16 ***           | 202153        |
| <b>PAI ~ time x <i>edge effects</i></b> | <b>Upper canopy</b> | <b>131.76</b> | <b>&lt;2e-16 ***</b> | <b>202135</b> |
| PAI ~ 1                                 | Total               |               |                      | 310475        |
| PAI ~ time                              | Total               | 0             | 1                    | 310470        |
| <b>PAI ~ <i>edge effects</i></b>        | <b>Total</b>        | <b>2298.1</b> | <b>&lt;2e-16 ***</b> | <b>308179</b> |
| PAI ~ time x <i>edge effects</i>        | Total               | 2301.2        | <2e-16 ***           | 308191        |

70

71 The most parsimonious model - after comparing all the models using AIC, as well as  $\chi^2$  and their  
72 corresponding *P* value - to predict PAI for total PAI (without accounting for the vertical stratification)  
73 was Eq. 4 (main text). Note that the lack of time effect in Eq. 4 indicated that there is significant  
74 temporal variation in only the vertical distribution of PAI (Supplementary Table 1; Supplementary  
75 Figure 4a, 4b).

76

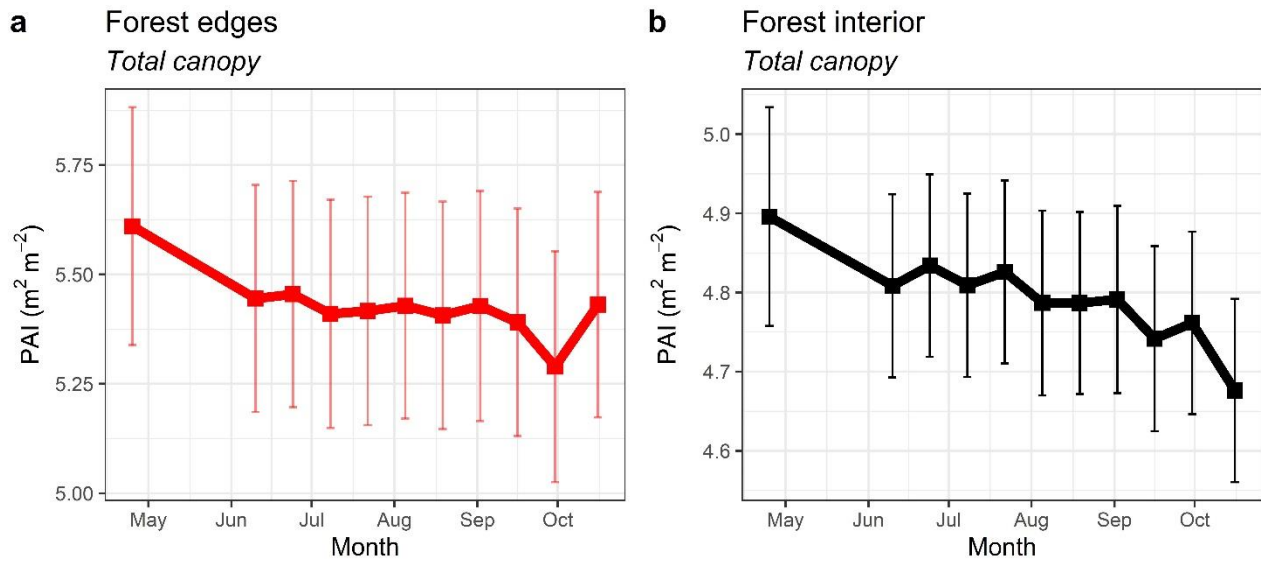

77

78 **Supplementary Figure 4. Plant Area Index time-series.** Plant Area Index for the whole profile of  
 79 vegetation predicted from linear mixed modelling with date of LiDAR measurements interacting with  
 80 a categorical variable indicating whether plots were near an edge as fixed variables. Transect was  
 81 used as a random variable to account for variation between transects of a) forest edges (< 40 m from  
 82 fragment margins) and b) interior of fragments ( $\geq 40$  m from fragment margins, black). Each point  
 83 represents the mean values predicted by mixed modelling, with the error bars depicting the  
 84 bootstrapped 95% confidence intervals.

85

## 86 **Supplementary methods 5. PAI variation with climatic variables**

87 We also illustrate the significant seasonal variations in PAI against the microclimatic variables  
 88 measured on the edges of the fragment and in the forest interior. The understory of interior forests  
 89 had sharp decreases in PAI between April and June (Supplementary Figure 5b), a period when soil  
 90 moisture was still high, and maximum temperatures were relatively low ( $27.8 \pm 0.64$  °C,  
 91 Supplementary Figure 5d). The understory PAI of these forests increased alongside increases in  
 92 temperature, and a full recovery in plant area occurred when the temperatures reached the highest  
 93 values in September.

94

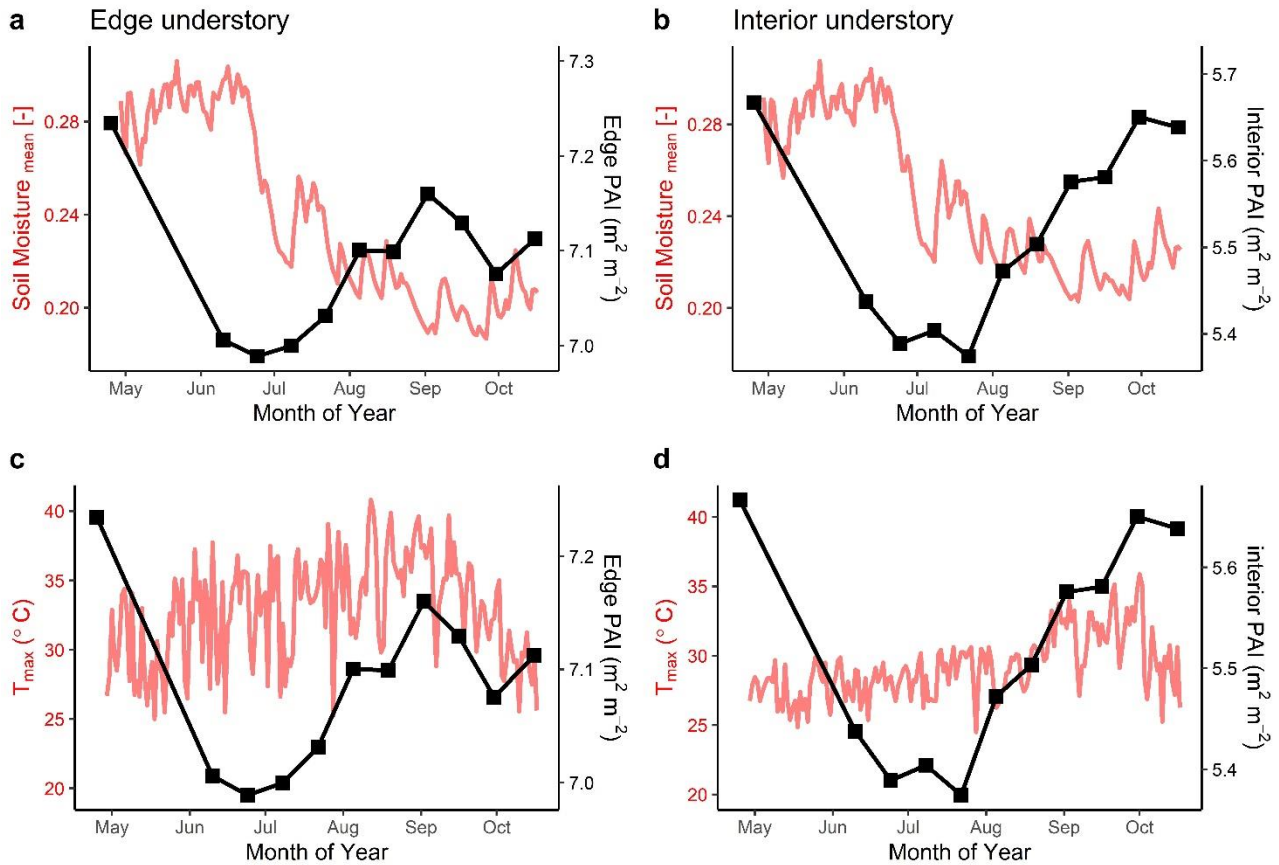

Supplementary Figure 5. Mean daily soil moisture of a) forest edges and b) in the interior of forest fragments. Maximum daily temperatures of c) forest edges and d) in the interior of forest fragments. Microclimate measurements in the understory of these forests were continuously measured every 15 minutes. These microclimatic variables were plotted against the predicted Plant Area Index (PAI) of the understory (< 15 m height) of forest edges and forest interior from Terrestrial Laser Scanning (TLS) measurements. Each black point represents the mean PAI values predicted by mixed modelling.

Both PAI of edges and forest interior were affected, with losses towards the dry season – a period of accumulated monthly precipitation below 200 mm, with significant decreases in soil moisture. The significant decreases in the upper canopy PAI of forest interior in September occurred when temperatures reached the highest temperatures, with some days registering maximum temperatures above 35 °C (Supplementary Figure 6d). The premature loss in upper canopy PAI on forest edges in particular was also synchronised with the very high temperatures above 35 °C during the whole dry



111 season (Supplementary Figure 6b) – which strongly supports the idea that the seasonal variation of  
 112 Amazonian forests at the upper canopy level is dependent on water availability and temperature, and  
 113 that fragmentation exacerbates these effects.

114

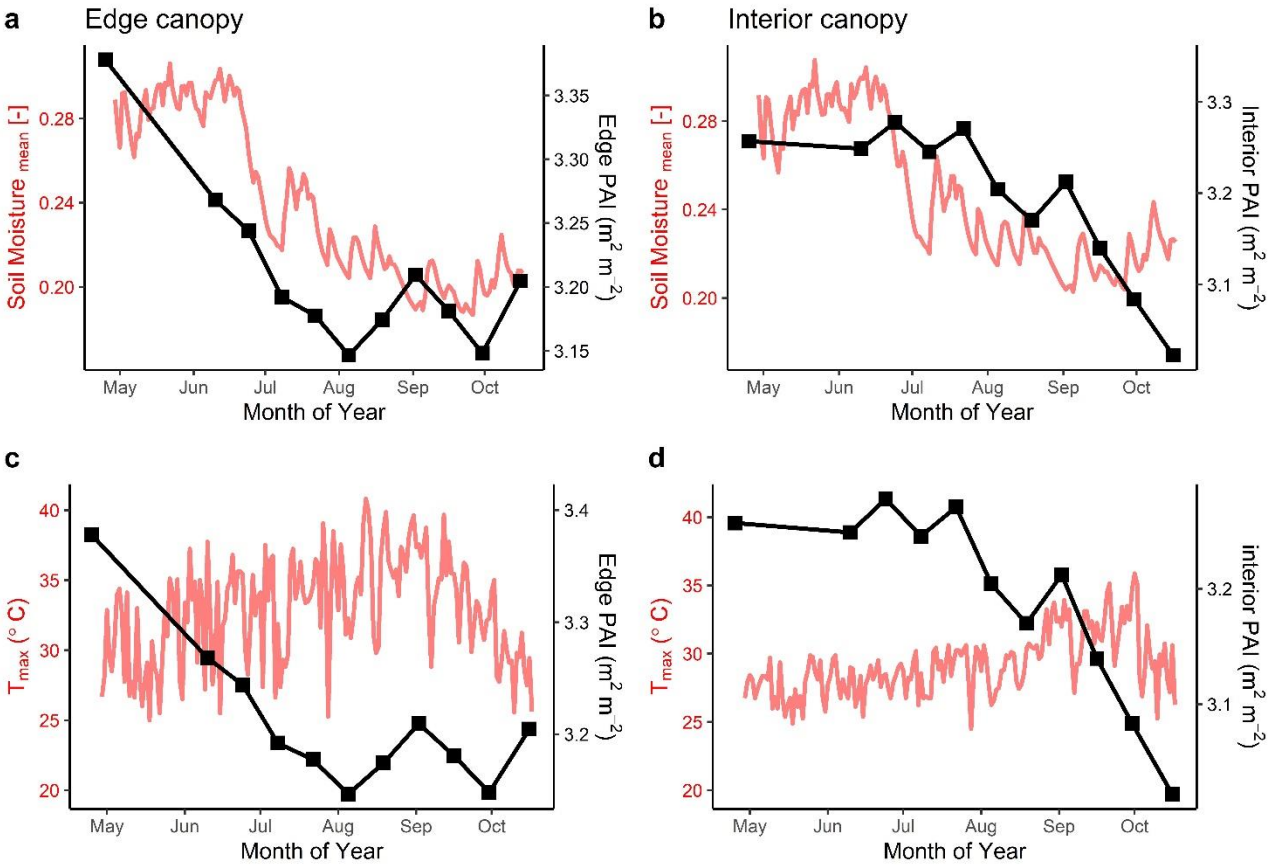

115

116 Supplementary Figure 6. Mean daily soil moisture of a) forest edges and b) in the interior of forest  
 117 fragments. Maximum daily temperatures of c) forest edges and d) in the interior of forest fragments.  
 118 Microclimate measurements were continuously obtained every 15 minutes. These microclimatic  
 119 variables were plotted against the predicted Plant Area Index (PAI) of the upper canopy (> 15 m  
 120 height) of forest edges and forest interior from Terrestrial Laser Scanning (TLS) measurements. Each  
 121 black point represents the mean PAI values predicted by mixed modelling.
